# Supplementary material
Source: Springer Nature journal article supplement (https://www.springermedizin.de/resource/supplementary/12990_2009_210_MOESM2_ESM.pdf/9612794)

**A**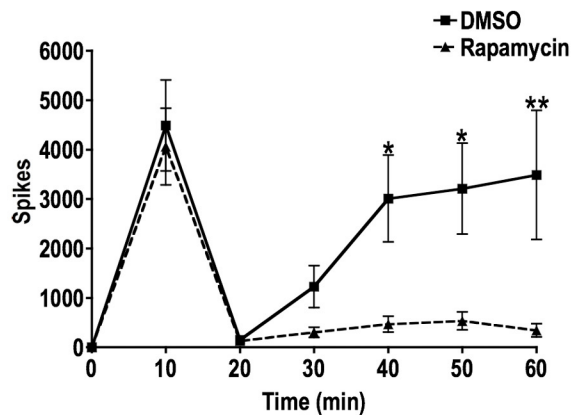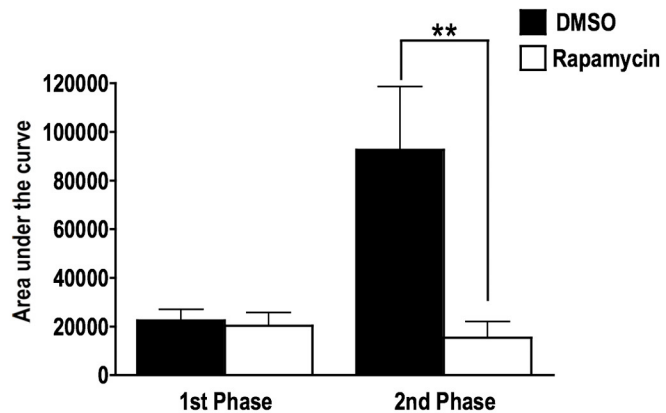**B**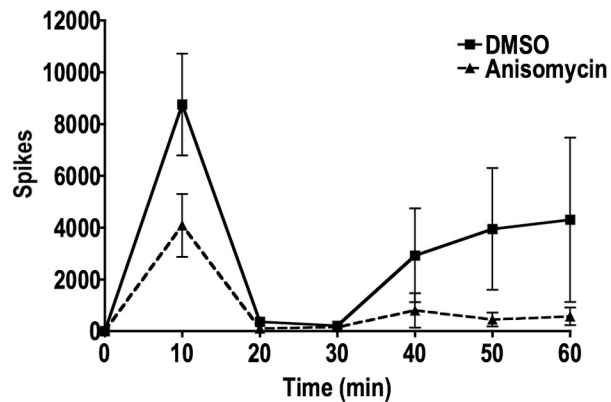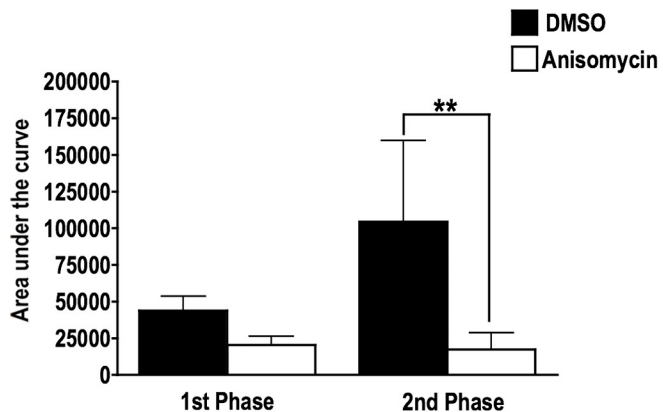

Supplement: MOESM2 [file 9612794]
